# Supplementary material for: All-perovskite tandem solar cells: from fundamentals to technological progress
Source: Royal Society of Chemistry journal article supplement (doi:10.1039/d3ee03638c), 2024-01-01
Supplement: d3ee03638c1.pdf [file d3ee03638c1.pdf]

## All-perovskite tandem solar cells from fundamentals to technological progress

Jaekeun Lim<sup>a</sup>, Nam-Gyu Park<sup>\*b,c</sup>, Sang Il Seok<sup>\*d</sup> and Michael Saliba<sup>\*a,e</sup>

<sup>a.</sup> *Institute for Photovoltaics (ipv), University of Stuttgart, Stuttgart, Germany*

<sup>b.</sup> *School of Chemical Engineering and Center for Antibonding Regulated Crystals, Sungkyunkwan University, Suwon, Republic of Korea*

<sup>c.</sup> *SKKU Institute of Energy Science and Technology (SIEST), Sungkyunkwan University, Suwon, Republic of Korea*

<sup>d.</sup> *Department of Energy Engineering, School of Energy and Chemical Engineering, Ulsan National Institute of Science and Technology, Ulsan, South Korea*

<sup>e.</sup> *Helmholtz Young Investigator Group FRONTRUNNER, IEK5-Photovoltaik, Forschungszentrum Jülich, Jülich, Germany*

**Supporting Information Table 1.** Device information of Fig. 1a-d.

\*Ref. 196 is not shown in Fig. 1b as Ref. 196 is overlapped with Ref. 163.

| Tandem PCE (%) | Active area (mm <sup>2</sup> ) | Terminal | Note                           | Ref. |
|----------------|--------------------------------|----------|--------------------------------|------|
| 28.5           | 4.9                            | 2T       | Fig. 1a                        | 5    |
| 28             | 4.9                            | 2T       | Certified                      |      |
| 25.7           | 5.76                           | 2T       | Certified                      | 26   |
| 26.3           | 5.76                           | 2T       | Certified                      | 30   |
| 26.4           | 104.4                          | 2T       | Certified                      | 31   |
| 25.1           | 4.9                            | 2T       | Triple junction                | 33   |
| 23.8           | 4.9                            | 2T       | Triple junction & Certified    |      |
| 24.3           | 4.9                            | 2T       | Fig. 1a & Triple junction      | 34   |
| 23.2           | 4.9                            | 2T       | Triple junction & Certified    |      |
| 6.7            | 9.19                           | 2T       | Fig. 1a & Triple junction      | 35   |
| 20.1           | 4.9                            | 2T       | Fig. 1a & Triple junction      | 36   |
| 16.8           | 6.76                           | 2T       | Triple junction                | 37   |
| 25.6           | 4.9                            | 2T       | Fig. 1a                        | 53   |
| 24.2           | 100                            | 2T       | Certified                      |      |
| 15.3           | 5000                           | 4T       | Flexible & Module              | 54   |
| 19.1           | 1225                           | 2T       | Module                         | 55   |
| 19.8           | 243                            | 2T       | Module                         |      |
| 18.3           | 243                            | 2T       | Module & Certified             |      |
| 22.5           | 2025                           | 2T       | Module                         | 56   |
| 21.7           | 2025                           | 2T       | Module & Certified             |      |
| 21.6           | 1430                           | 2T       | Module                         | 57   |
| 24.5           | 2025                           | 2T       | Certified & Module             | 58   |
| 24.9           | 2000                           | 2T       | Module                         |      |
| 23.8           | 6400                           | 2T       | Module                         |      |
| 22.6           | 9                              | 4T       | Flexible substrate             | 61   |
| 23.8           | 9                              | 2T       | Flexible substrate             |      |
| 21.3           | 5.8                            | 2T       | Flexible substrate             | 62   |
| 24.4           | 4.9                            | 2T       | Certified & Flexible substrate | 63   |
| 24.3           | 9                              | 2T       | Certified                      | 103  |
| 28.51          | 9                              | 2T       | Bifacial                       | 128  |
| 29.3           | 8                              | 2T       | Bifacial                       | 130  |
| 24.1           | 5.29                           | 2T       | Flexible substrate             | 132  |
| 20.3           | 5.29                           | 2T       | Flexible substrate             |      |
| 19.08          | 3.14 or 10                     | 4T       | Fig. 1a                        | 143  |

|       |      |    |                    |      |
|-------|------|----|--------------------|------|
| 24.79 | 9    | 2T | Certified          | 148  |
| 21.2  | 8.5  | 4T | Fig. 1a            | 149  |
| 20.1  | 20   | 4T | Fig. 1a            | 153  |
| 27.4  | 4.9  | 2T | Fig. 1a            | 156  |
| 26.29 | 4.9  | 2T | Certified          |      |
| 24.79 | 7.3  | 2T | Certified          | 157  |
| 22    | 105  | 2T | Certified          |      |
| 25.4  | 10.5 | 4T | Fig. 1a            | 161  |
| 26.7  | 4.9  | 2T | Fig. 1a            | 163  |
| 26.4  | 4.9  | 2T | Certified          |      |
| 10.8  | 9.6  | 2T | Fig. 1a            | 172  |
| 23.1  | 10   | 4T | Fig. 1a            | 179  |
| 23.3  | 2025 | 4T | Module             | 188  |
| 27.5  | 12   | 2T | Certified          | 190  |
| 26.96 | 4.2  | 2T | Certified          | 193  |
| 22.2  | 9    | 2T | Flexible substrate | 195  |
| 26.4  | 4.9  | 2T | Certified          | 196* |
| 27.04 | 4.2  | 2T | Certified          | 199  |

**Supporting Information Table 2.A.** Absorber layer thickness database of double junction APTSCs.

WB\*: wide bandgap

NB\*: narrow bandgap

Thickness data was extracted manually from each paper's Scanning Electron Microscope (SEM) images.

§: requested to author to obtain the value

| Max. WB thickness (nm) | Min. WB thickness (nm) | Max. NB thickness (nm) | Min. NB thickness (nm) | Tandem PCE (%)                       | Terminal | Ref. |
|------------------------|------------------------|------------------------|------------------------|--------------------------------------|----------|------|
| 382                    | 319                    | 1277                   | 1172                   | 28.5                                 | 2T       | 5    |
| 378                    | 296                    | 922                    | 768                    | 25.7                                 | 2T       | 26   |
| 378                    | 318                    | 788                    | 711                    | 26.68                                | 2T       | 28   |
| 774                    | 719                    | N/A                    | N/A                    | 26.3                                 | 4T       | 29   |
| 304                    | 230                    | 646                    | 484                    | 27.22                                | 2T       | 30   |
| 268                    | 243                    | 726                    | 694                    | 27                                   | 2T       | 31   |
| 279                    | 243                    | 730                    | 905                    | 20.1                                 | 2T       | 36   |
| 530                    | 477                    | 1036                   | 819                    | 25.6                                 | 2T       | 53   |
| 211                    | 125                    | 436                    | 374                    | 15.3                                 | 4T       | 54   |
| 345                    | 279                    | 892                    | 792                    | 25.1                                 | 2T       | 56   |
| 248                    | 183                    | 1041                   | 854                    | 23.1                                 | 2T       | 57   |
| 298                    | 246                    | 973                    | 897                    | 26.8                                 | 2T       | 58   |
| ca. 500 <sup>§</sup>   | ca. 500 <sup>§</sup>   | 594                    | 500                    | 23.1                                 | 4T       | 60   |
| 340                    | 281                    | 781                    | 630                    | 23.8                                 | 2T       | 61   |
|                        |                        |                        |                        | 22.6                                 | 4T       |      |
| 333                    | 269                    | 861                    | 691                    | 23.1                                 | 2T       | 62   |
| 533                    | 370                    | 963                    | 823                    | 24.7                                 | 2T       | 63   |
| 424                    | 408                    | 1058                   | 894                    | 25.5                                 | 2T       | 103  |
| N/A                    | N/A                    | 536                    | 439                    | 20.8                                 | 2T       | 120  |
| 389                    | 336                    | 994                    | 884                    | 26.3                                 | 2T       | 121  |
| 480                    | 365                    | 1083                   | 973                    | 28.51                                | 2T       | 128  |
| 434                    | 430                    | 917                    | 700                    | 20.1                                 | 2T       | 129  |
| 607                    | 558                    | 1889                   | 806                    | 24.4<br>(Mono)<br>29.3<br>(Bifacial) | 2T       | 130  |
| 360                    | 240                    | 957                    | 742                    | 25.6                                 | 2T       | 131  |

|     |     |      |      |       |    |     |
|-----|-----|------|------|-------|----|-----|
| 353 | 261 | 940  | 895  | 25.3  | 2T | 132 |
| 159 | 130 | 160  | 103  | 19.08 | 2T | 143 |
| 473 | 388 | 727  | 669  | 19.1  | 2T | 144 |
| 277 | 251 | 805  | 716  | 21.1  | 2T | 145 |
| 273 | 255 | 713  | 593  | 10.5  | 2T | 146 |
| N/A | N/A | 529  | 396  | 23    | 4T | 147 |
| 230 | 200 | 628  | 567  | 25.15 | 2T | 148 |
| N/A | N/A | 672  | 618  | 21.2  | 4T | 149 |
| 360 | 325 | 1040 | 962  | 26.2  | 2T | 152 |
| 461 | 343 | 470  | 332  | 16.9  | 2T | 153 |
| N/A | N/A | 559  | 504  | 23.6  | 4T | 154 |
| 488 | 351 | 1055 | 928  | 27.4  | 2T | 156 |
| 353 | 271 | 702  | 543  | 24.79 | 2T | 157 |
| 471 | 421 | 960  | 727  | 23    | 2T | 158 |
| N/A | N/A | 1016 | 855  | 23.1  | 2T | 161 |
|     |     |      |      | 25.4  | 4T |     |
| 633 | 581 | N/A  | N/A  | 23.1  | 4T | 162 |
| 452 | 321 | 1145 | 1133 | 26.7  | 2T | 163 |
| 259 | 205 | 607  | 534  | 23.7  | 2T | 165 |
| 321 | 272 | 700  | 690  | 21.5  | 2T | 167 |
| 321 | 279 | 877  | 750  | 24.9  | 2T | 169 |
| 477 | 388 | 776  | 715  | 23.5  | 2T | 171 |
| 588 | 427 | 260  | 229  | 10.4  | 2T | 172 |
| 437 | 261 | 161  | 114  | 5.1   | 2T | 175 |
| 290 | 244 | 252  | 212  | 17.9  | 2T | 177 |
| 461 | 366 | 726  | 636  | 24.4  | 2T | 178 |
| 212 | 160 | 368  | 336  | 18.4  | 2T | 181 |
| 271 | 236 | 703  | 629  | 24.1  | 2T | 182 |
| 478 | 379 | 865  | 755  | 24.66 | 2T | 183 |
| 424 | 384 | 884  | 687  | 26.08 | 2T | 184 |
| 512 | 484 | N/A  | N/A  | 28.06 | 4T | 186 |
| 411 | 339 | 857  | 753  | 26.03 | 2T | 187 |
| 424 | 342 | 1085 | 972  | 23.3  | 4T | 188 |
| 425 | 314 | 564  | 385  | 23.52 | 2T | 189 |
| 366 | 311 | 912  | 803  | 27.5  | 2T | 190 |
| 243 | 291 | 857  | 693  | 26.1  | 2T | 192 |
| 380 | 362 | 825  | 658  | 27.3  | 2T | 193 |
| 530 | 436 | N/A  | N/A  | 27.64 | 4T | 194 |
| 372 | 361 | 1248 | 949  | 26.1  | 2T | 195 |
| 540 | 352 | 1100 | 784  | 27.3  | 2T | 196 |
| 393 | 382 | 1123 | 876  | 27.1  | 2T | 198 |
| 402 | 312 | 974  | 867  | 27.04 | 2T | 199 |
| 393 | 388 | 848  | 768  | 26.33 | 2T | 200 |
| 678 | 563 | N/A  | N/A  | 28.35 | 4T | 201 |
| 436 | 330 | 1060 | 928  | 27    | 2T | 202 |
| 363 | 306 | -    | -    | 26.89 | 4T | 203 |
| 435 | 420 | -    | -    | 28.07 | 4T | 204 |

**Supporting Information Table 2.B.** Absorber layer thickness database of triple junction APTSCs.

WB\*: wide bandgap

IB\*: intermediate bandgap

NB\*: narrow bandgap

Thickness data was extracted manually from each paper's SEM images.

| Max. WB thickness | Min. WB thickness | Max. IB thickness | Min. IB thickness | Max. NB thickness | Min. NB thickness | Tandem PCE (%) | Terminal | Ref. |
|-------------------|-------------------|-------------------|-------------------|-------------------|-------------------|----------------|----------|------|
|-------------------|-------------------|-------------------|-------------------|-------------------|-------------------|----------------|----------|------|

|      |      |      |      |      |      |      |    |    |
|------|------|------|------|------|------|------|----|----|
| (nm) | (nm) | (nm) | (nm) | (nm) | (nm) |      |    |    |
| 236  | 195  | 1081 | 1020 | 1236 | 1126 | 24.3 | 2T | 34 |
| 502  | 467  | 654  | 567  | 473  | 368  | 6.7  | 2T | 35 |
| 96   | 80   | 367  | 327  | 464  | 412  | 16.8 | 2T | 37 |

## References

- 5 R. Lin, Y. Wang, Q. Lu, B. Tang, J. Li, H. Gao, Y. Gao, H. Li, C. Ding, J. Wen, P. Wu, C. Liu, S. Zhao, K. Xiao, Z. Liu, C. Ma, Y. Deng, L. Li, F. Fan and H. Tan, *Nature*, , DOI:10.1038/s41586-023-06278-z.
- 26 J. Luo, R. He, H. Lai, C. Chen, J. Zhu, Y. Xu, F. Yao, T. Ma, Y. Luo, Z. Yi, Y. Jiang, Z. Gao, J. Wang, W. Wang, H. Huang, Y. Wang, S. Ren, Q. Lin, C. Wang, F. Fu and D. Zhao, *Advanced Materials*, 2023, 2300352.
- 28 Y. Zhao, C. Wang, T. Ma, L. Zhou, Z. Wu, H. Wang, C. Chen, Z. Yu, W. Sun, A. Wang, H. Huang, B. Zou, D. Zhao and X. Li, *Energy Environ Sci*, , DOI:10.1039/d2ee04087e.
- 29 X. Hu, J. Li, C. Wang, H. Cui, Y. Liu, S. Zhou, H. Guan, W. Ke, C. Tao and G. Fang, *Nanomicro Lett*, , DOI:10.1007/s40820-023-01078-6.
- 30 J. Zhu, Y. Luo, R. He, C. Chen, Y. Wang, J. Luo, Z. Yi, J. Thiesbrummel, C. Wang, F. Lang, H. Lai, Y. Xu, J. Wang, Z. Zhang, W. Liang, G. Cui, S. Ren, X. Hao, H. Huang, Y. Wang, F. Yao, Q. Lin, L. Wu, J. Zhang, M. Stolterfoht, F. Fu and D. Zhao, *Nat Energy*, , DOI:10.1038/s41560-023-01274-z.
- 31 R. He, W. Wang, Z. Yi, F. Lang, C. Chen, J. Luo, J. Zhu, J. Thiesbrummel, S. Shah, K. Wei, Y. Luo, C. Wang, H. Lai, H. Huang, J. Zhou, B. Zou, X. Yin, S. Ren, X. Hao, L. Wu, J. Zhang, J. Zhang, M. Stolterfoht, F. Fu, W. Tang and D. Zhao, *Nature*, , DOI:10.1038/s41586-023-05992-y.
- 33 J. Wang, L. Zeng, D. Zhang, A. Maxwell, H. Chen, K. Datta, A. Caiazzo, W. H. M. Remmerswaal, N. R. M. Schipper, Z. Chen, K. Ho, A. Dasgupta, G. Kusch, R. Olleary, L. Bellini, S. Hu, Z. Wang, C. Li, S. Teale, L. Grater, B. Chen, M. M. Wienk, R. A. Oliver, H. J. Snaith, R. A. J. Janssen and E. H. Sargent, *Nat Energy*, , DOI:10.1038/s41560-023-01406-5.
- 34 Z. Wang, L. Zeng, T. Zhu, H. Chen, B. Chen, D. J. Kubicki, A. Balvanz, C. Li, A. Maxwell, E. Ugur, R. dos Reis, M. Cheng, G. Yang, B. Subedi, D. Luo, J. Hu, J. Wang, S. Teale, S. Mahesh, S. Wang, S. Hu, E. D. Jung, M. Wei, S. M. Park, L. Grater, E. Aydin, Z. Song, N. J. Podraza, Z. H. Lu, J. Huang, V. P. Dravid, S. De Wolf, Y. Yan, M. Grätzel, M. G. Kanatzidis and E. H. Sargent, *Nature*, 2023, 618, 74–79.
- 35 D. P. McMeekin, S. Mahesh, N. K. Noel, M. T. Klug, J. C. Lim, J. H. Warby, J. M. Ball, L. M. Herz, M. B. Johnston and H. J. Snaith, *Joule*, 2019, 3, 387–401.
- 36 K. Xiao, J. Wen, Q. Han, R. Lin, Y. Gao, S. Gu, Y. Zang, Y. Nie, J. Zhu, J. Xu and H. Tan, *ACS Energy Lett*, 2020, 5, 2819–2826.
- 37 J. Wang, V. Zardetto, K. Datta, D. Zhang, M. M. Wienk and R. A. J. Janssen, *Nat Commun*, , DOI:10.1038/s41467-020-19062-8.
- 53 K. Xiao, R. Lin, Q. Han, Y. Hou, Z. Qin, H. T. Nguyen, J. Wen, M. Wei, V. Yeddu, M. I. Saidaminov, Y. Gao, X. Luo, Y. Wang, H. Gao, C. Zhang, J. Xu, J. Zhu, E. H. Sargent and H. Tan, *Nat Energy*, 2020, 5, 870–880.
- 54 V. Babu, M. A. Mejia Escobar, R. Fuentes Pineda, M. Ścigaj, P. Spinelli and K. Wojciechowski, *Mater Today Energy*, , DOI:10.1016/j.mtener.2022.101073.
- 55 B. Abdollahi Nejand, D. B. Ritzer, H. Hu, F. Schackmar, S. Moghadamzadeh, T. Feeney, R. Singh, F. Laufer, R. Schmager, R. Azmi, M. Kaiser, T. Abzieher, S. Gharibzadeh, E. Ahlswede, U. Lemmer, B. S. Richards and U. W. Paetzold, *Nat Energy*, 2022, 7, 620–630.

- 56 K. Xiao, Y.-H. Lin, M. Zhang, R. D. J. Oliver, X. Wang, Z. Liu, X. Luo, J. Li, D. Lai, H. Luo, R. Lin, J. Xu, Y. Hou, H. J. Snaith and H. Tan, Scalable processing for realizing 21.7%-efficient all-perovskite tandem solar modules, 2022, vol. 376.
- 57 X. Dai, S. Chen, H. Jiao, L. Zhao, K. Wang, Z. Ni, Z. Yu, B. Chen, Y. Gao and J. Huang, *Nat Energy*, 2022, 7, 923–931.
- 58 H. Gao, K. Xiao, R. Lin, S. Zhao, W. Wang, S. Dayneko, C. Duan, C. Ji, H. Sun, A. Dinh Bui, C. Liu, J. Wen, W. Kong, H. Luo, X. Zheng, Z. Liu, H. Nguyen, J. Xie, L. Li, M. I. Saidaminov and H. Tan, Homogeneous crystallization and buried interface passivation for perovskite tandem solar modules, .
- 60 J. Kurisinkal Pious, Y. Zwirner, H. Lai, S. Olthof, Q. Jeangros, E. Gilshtein, R. K. Kothandaraman, K. Artuk, P. Wechsler, C. Chen, C. M. Wolff, D. Zhao, A. N. Tiwari and F. Fu, *ACS Appl Mater Interfaces*, , DOI:10.1021/acsami.2c19124.
- 61 H. Lai, J. Luo, Y. Zwirner, S. Olthof, A. Wiecek, F. Ye, Q. Jeangros, X. Yin, F. Akhundova, T. Ma, R. He, R. K. Kothandaraman, X. Chin, E. Gilshtein, A. Müller, C. Wang, J. Thiesbrummel, S. Siol, J. M. Prieto, T. Unold, M. Stolterfoht, C. Chen, A. N. Tiwari, D. Zhao and F. Fu, *Adv Energy Mater*, , DOI:10.1002/aenm.202202438.
- 62 A. F. Palmstrom, G. E. Eperon, T. Leijtens, R. Prasanna, S. N. Habisreutinger, W. Nemeth, E. A. Gaubling, S. P. Dunfield, M. Reese, S. Nanayakkara, T. Moot, J. Werner, J. Liu, B. To, S. T. Christensen, M. D. McGehee, M. F. A. M. van Hest, J. M. Luther, J. J. Berry and D. T. Moore, *Joule*, 2019, 3, 2193–2204.
- 63 L. Li, Y. Wang, X. Wang, R. Lin, X. Luo, Z. Liu, K. Zhou, S. Xiong, Q. Bao, G. Chen, Y. Tian, Y. Deng, K. Xiao, J. Wu, M. I. Saidaminov, H. Lin, C. Q. Ma, Z. Zhao, Y. Wu, L. Zhang and H. Tan, *Nat Energy*, 2022, 7, 708–717.
- 103 J. Tong, Q. Jiang, A. J. Ferguson, A. F. Palmstrom, X. Wang, J. Hao, S. P. Dunfield, A. E. Louks, S. P. Harvey, C. Li, H. Lu, R. M. France, S. A. Johnson, F. Zhang, M. Yang, J. F. Geisz, M. D. McGehee, M. C. Beard, Y. Yan, D. Kuciauskas, J. J. Berry and K. Zhu, *Nature Energy* 2022 7:7, 2022, 7, 642–651.
- 120 R. Prasanna, T. Leijtens, S. P. Dunfield, J. A. Raiford, E. J. Wolf, S. A. Swifter, J. Werner, G. E. Eperon, C. de Paula, A. F. Palmstrom, C. C. Boyd, M. F. A. M. van Hest, S. F. Bent, G. Teeter, J. J. Berry and M. D. McGehee, *Nat Energy*, 2019, 4, 939–947.
- 121 P. Wu, J. Wen, Y. Wang, Z. Liu, R. Lin, H. Li, H. Luo and H. Tan, *Adv Energy Mater*, , DOI:10.1002/aenm.202202948.
- 128 H. Li, Y. Wang, H. Gao, M. Zhang, R. Lin, P. Wu, K. Xiao and H. Tan, *eLight*, , DOI:10.1186/s43593-022-00028-w.
- 129 L. Gil-Escrig, S. Hu, K. P. S. Zanoni, A. Paliwal, M. A. Hernández-Fenollosa, C. Roldán-Carmona, M. Sessolo, A. Wakamiya and H. J. Bolink, *ACS Mater Lett*, 2022, 4, 2638–2644.
- 130 B. Chen, Z. Yu, A. Onno, Z. Yu, S. Chen, J. Wang, Z. C. Holman and J. Huang, Bifacial all-perovskite tandem solar cells, 2022, vol. 8.
- 131 T. Li, J. Xu, R. Lin, S. Teale, H. Li, Z. Liu, C. Duan, Q. Zhao, K. Xiao, P. Wu, B. Chen, S. Jiang, S. Xiong, H. Luo, S. Wan, L. Li, Q. Bao, Y. Tian, X. Gao, J. Xie, E. H. Sargent and H. Tan, *Nat Energy*, , DOI:10.1038/s41560-023-01250-7.
- 132 Y. Wang, R. Lin, X. Wang, C. Liu, Y. Ahmed, Z. Huang, Z. Zhang, H. Li, M. Zhang, Y. Gao, H. Luo, P. Wu, H. Gao, X. Zheng, M. Li, Z. Liu, W. Kong, L. Li, K. Liu, M. I. Saidaminov, L. Zhang and H. Tan, *Nat Commun*, 2023, 14, 1819.
- 143 Z. Yang, A. Rajagopal, C. C. Chueh, S. B. Jo, B. Liu, T. Zhao and A. K. Y. Jen, *Advanced Materials*, 2016, 28, 8990–8997.

- 144 T. Leijtens, R. Prasanna, K. A. Bush, G. E. Eperon, J. A. Raiford, A. Gold-Parker, E. J. Wolf, S. A. Swifter, C. C. Boyd, H. P. Wang, M. F. Toney, S. F. Bent and M. D. McGehee, *Sustain Energy Fuels*, 2018, 2, 2450–2459.
- 145 Z. Song, D. Zhao, C. Chen, R. H. Ahangharnejhad, C. Li, K. Ghimire, N. J. Podraza, M. J. Heben, K. Zhu and Y. Yan, in 2019 IEEE 46th Photovoltaic Specialists Conference (PVSC), 2019, pp. 743–746.
- 146 D. Zhao, C. Chen, C. Wang, M. M. Junda, Z. Song, C. R. Grice, Y. Yu, C. Li, B. Subedi, N. J. Podraza, X. Zhao, G. Fang, R. G. Xiong, K. Zhu and Y. Yan, *Nat Energy*, 2018, 3, 1093–1100.
- 147 B. Abdollahi Nejjand, I. M. Hossain, M. Jakoby, S. Moghadamzadeh, T. Abzieher, S. Gharibzadeh, J. A. Schwenzer, P. Nazari, F. Schackmar, D. Hauschild, L. Weinhardt, U. Lemmer, B. S. Richards, I. A. Howard and U. W. Paetzold, *Adv Energy Mater*, , DOI:10.1002/aenm.201902583.
- 148 C. Wang, Y. Zhao, T. Ma, Y. An, R. He, J. Zhu, C. Chen, S. Ren, F. Fu, D. Zhao and X. Li, *Nat Energy*, 2022, 7, 744–753.
- 149 D. Zhao, Y. Yu, C. Wang, W. Liao, N. Shrestha, C. R. Grice, A. J. Cimaroli, L. Guan, R. J. Ellingson, K. Zhu, X. Zhao, R. G. Xiong and Y. Yan, *Nat Energy*, , DOI:10.1038/nenergy.2017.18.
- 152 J. Wen, Y. Zhao, Z. Liu, H. Gao, R. Lin, S. Wan, C. Ji, K. Xiao, Y. Gao, Y. Tian, J. Xie, C. J. Brabec and H. Tan, *Advanced Materials*, , DOI:10.1002/adma.202110356.
- 153 G. E. Eperon, T. Leijtens, K. A. Bush, R. Prasanna, T. Green, J. T.-W. Wang, D. P. McMeekin, G. Volonakis, R. L. Milot, R. May, A. Palmstrom, D. J. Slotcavage, R. A. Belisle, J. B. Patel, E. S. Parrott, R. J. Sutton, W. Ma, F. Moghadam, B. Conings, A. Babayigit, H.-G. Boyen, S. Bent, F. Giustino, L. M. Herz, M. B. Johnston, M. D. McGehee and H. J. Snaith, *Science* (1979), 2016, 354, 861–865.
- 154 S. Moghadamzadeh, I. M. Hossain, T. Duong, S. Gharibzadeh, T. Abzieher, H. Pham, H. Hu, P. Fassel, U. Lemmer, B. A. Nejjand and U. W. Paetzold, *J Mater Chem A Mater*, 2020, 8, 24608–24619.
- 156 H. Chen, A. Maxwell, C. Li, S. Teale, B. Chen, T. Zhu, E. Ugur, G. Harrison, L. Grater, J. Wang, Z. Wang, L. Zeng, S. M. Park, L. Chen, P. Serles, R. A. Awni, B. Subedi, X. Zheng, C. Xiao, N. J. Podraza, T. Filleter, C. Liu, Y. Yang, J. M. Luther, S. De Wolf, M. G. Kanatzidis, Y. Yan and E. H. Sargent, *Nature*, 2023, 613, 676–681.
- 157 R. Lin, K. Xiao, Z. Qin, Q. Han, C. Zhang, M. Wei, M. I. Saidaminov, Y. Gao, J. Xu, M. Xiao, A. Li, J. Zhu, E. H. Sargent and H. Tan, *Nat Energy*, 2019, 4, 864–873.
- 158 Z. Yang, Z. Yu, H. Wei, X. Xiao, Z. Ni, B. Chen, Y. Deng, S. N. Habisreutinger, X. Chen, K. Wang, J. Zhao, P. N. Rudd, J. J. Berry, M. C. Beard and J. Huang, *Nat Commun*, , DOI:10.1038/s41467-019-12513-x.
- 161 J. Tong, Z. Song, D. Hoe Kim, X. Chen, C. Chen, A. F. Palmstrom, P. F. Ndione, M. O. Reese, S. P. Dunfield, O. G. Reid, J. Liu, F. Zhang, S. P. Harvey, Z. Li, S. T. Christensen, G. Teeter, D. Zhao, M. M. Al-Jassim, M. F. A M van Hest, M. C. Beard, S. E. Shaheen, J. J. Berry, Y. Yan and K. Zhu, *Carrier lifetimes of >1 ms in Sn-Pb perovskites enable efficient all-perovskite tandem solar cells*, 2019, vol. 364.
- 162 Z. Chang, D. Zheng, S. Zhao, L. Wang, S. Wu, L. Liu, Z. Li, L. Zhang, Q. Dong, H. Wang, S. Wang, K. Wang and S. Liu, *Adv Funct Mater*, , DOI:10.1002/adfm.202214983.
- 163 R. Lin, J. Xu, M. Wei, Y. Wang, Z. Qin, Z. Liu, J. Wu, K. Xiao, B. Chen, S. M. Park, G. Chen, H. R. Atapattu, K. R. Graham, J. Xu, J. Zhu, L. Li, C. Zhang, E. H. Sargent and H. Tan, *Nature*, 2022, 603, 73–78.
- 165 M. Wei, K. Xiao, G. Walters, R. Lin, Y. Zhao, M. I. Saidaminov, P. Todorović, A. Johnston, Z. Huang, H. Chen, A. Li, J. Zhu, Z. Yang, Y. K. Wang, A. H. Proppe, S. O. Kelley, Y. Hou, O. Voznyy, H. Tan and E. H. Sargent, *Advanced Materials*, , DOI:10.1002/adma.201907058.
- 167 M. A. Mahmud, J. Zheng, S. Tang, C. Liao, G. Wang, J. Bing, T. L. Leung, A. D. Bui, H. Chen, J. Yi, S. P. Bremner, H. T. Nguyen and A. W. Y. Ho-Baillie, *ACS Energy Lett*, 2023, 8, 21–30.

- 169 Y. Wang, S. Gu, G. Liu, L. Zhang, Z. Liu, R. Lin, K. Xiao, X. Luo, J. Shi, J. Du, F. Meng, L. Li, Z. Liu and H. Tan, *Sci China Chem*, 2021, 64, 2025–2034.
- 171 H. Gao, Q. Lu, K. Xiao, Q. Han, R. Lin, Z. Liu, H. Li, L. Li, X. Luo, Y. Gao, Y. Wang, J. Wen, Z. Zou, Y. Zhou and H. Tan, *Solar RRL*, , DOI:10.1002/solr.202100814.
- 172 J. H. Heo and S. H. Im, *Advanced Materials*, 2016, 28, 5121–5125.
- 175 R. Sheng, M. T. Hörlantner, Z. Wang, Y. Jiang, W. Zhang, A. Agosti, S. Huang, X. Hao, A. Ho-Baillie, M. Green and H. J. Snaith, *Journal of Physical Chemistry C*, 2017, 121, 27256–27262.
- 177 C. Li, Z. S. Wang, H. L. Zhu, D. Zhang, J. Cheng, H. Lin, D. Ouyang and W. C. H. Choy, *Adv Energy Mater*, , DOI:10.1002/aenm.201801954.
- 178 Z. Yu, Z. Yang, Z. Ni, Y. Shao, B. Chen, Y. Lin, H. Wei, Z. J. Yu, Z. Holman and J. Huang, *Nat Energy*, 2020, 5, 657–665.
- 179 D. Zhao, C. Wang, Z. Song, Y. Yu, C. Chen, X. Zhao, K. Zhu and Y. Yan, *ACS Energy Lett*, 2018, 3, 305–306.
- 181 A. Rajagopal, Z. Yang, S. B. Jo, I. L. Braly, P. W. Liang, H. W. Hillhouse and A. K. Y. Jen, *Advanced Materials*, , DOI:10.1002/adma.201702140.
- 182 Y.-H. Chiang, K. Frohna, H. Salway, A. Abfalterer, B. Roose, M. Anaya and S. D. Stranks, *Efficient all-perovskite tandem solar cells by dual-interface optimisation of vacuum-deposited wide-bandgap perovskite*, .
- 183 D. Vidyasagar, Y. Yun, J. Yu Cho, H. Lee, K. Won Kim, Y. Tae Kim, S. Woong Yang, J. Jung, W. Chang Choi, S. Kim, R. Kumar Gunasekaran, S. B. Kang, K. Heo, D. H. Kim, J. Heo and S. Lee, *Journal of Energy Chemistry*, 2024, 88, 317–326.
- 184 L. Qiao, T. Ye, P. Wang, T. Wang, L. Zhang, R. Sun, W. Kong and X. Yang, *Adv Funct Mater*, , DOI:10.1002/adfm.202308908.
- 186 H. Guan, S. Zhou, S. Fu, D. Pu, X. Chen, Y. Ge, S. Wang, C. Wang, H. Cui, J. Liang, X. Hu, W. Meng, G. Fang and W. Ke, *Advanced Materials*, , DOI:10.1002/adma.202307987.
- 187 T. Ma, H. Wang, Z. Wu, Y. Zhao, C. Chen, X. Yin, L. Hu, F. Yao, Q. Lin, S. Wang, D. Zhao, X. Li and C. Wang, *Advanced Materials*, , DOI:10.1002/adma.202308240.
- 188 H. Sun, K. Xiao, H. Gao, C. Duan, S. Zhao, J. Wen, Y. Wang, R. Lin, X. Zheng, H. Luo, C. Liu, P. Wu, W. Kong, Z. Liu, L. Li and H. Tan, *Advanced Materials*, , DOI:10.1002/adma.202308706.
- 189 S. Lee, M. Y. Woo, C. Kim, K. W. Kim, H. Lee, S. B. Kang, J. M. Im, M. J. Jeong, Y. Hong, J. W. Yoon, S. Y. Kim, K. Heo, K. Zhu, J. S. Park, J. H. Noh and D. H. Kim, *Chemical Engineering Journal*, , DOI:10.1016/j.cej.2023.147587.
- 190 F. Yang, P. Tockhorn, A. Musiienko, F. Lang, D. Menzel, R. Macqueen, E. Köhnen, K. Xu, S. Mariotti, D. Mantione, L. Merten, A. Hinderhofer, B. Li, D. R. Wargulski, S. P. Harvey, J. Zhang, F. Scheler, S. Berwig, M. Roß, J. Thiesbrummel, A. Al-Ashouri, K. O. Brinkmann, T. Riedl, F. Schreiber, D. Abou-Ras, H. Snaith, D. Neher, L. Korte, M. Stollerfoht and S. Albrecht, *Advanced Materials*, , DOI:10.1002/adma.202307743.
- 192 S. Li, Z. Zheng, J. Ju, S. Cheng, F. Chen, Z. Xue, L. Ma and Z. Wang, *Advanced Materials*, , DOI:10.1002/adma.202307701.
- 193 D. Yu, M. Pan, G. Liu, X. Jiang, X. Wen, W. Li, S. Chen, W. Zhou, H. Wang, Y. Lu, M. Ma, Z. Zang, P. Cheng, Q. Ji, F. Zheng and Z. Ning, *Nat Energy*, , DOI:10.1038/s41560-023-01441-2.
- 194 D. Pu, S. Zhou, H. Guan, P. Jia, G. Chen, H. Fang, S. Fu, C. Wang, H. Hushvaktov, A. Jumabaev, W. Meng, X. Wang, G. Fang and W. Ke, *Adv Funct Mater*, , DOI:10.1002/adfm.202314349.

- 195 Z. Xie, S. Chen, Y. Pei, L. Li, S. Zhang and P. Wu, *Chemical Engineering Journal*, , DOI:10.1016/j.cej.2024.148638.
- 196 A. Maxwell, H. Chen, L. Grater, C. Li, S. Teale, J. Wang, L. Zeng, Z. Wang, S. M. Park, M. Vafaie, S. Sidhik, I. W. Metcalf, Y. Liu, A. D. Mohite, B. Chen and E. H. Sargent, *ACS Energy Lett*, 2024, 9, 520–527.
- 198 X. Lv, W. Li, J. Zhang, Y. Yang, X. Jia, Y. Ji, Q. Lin, W. Huang, T. Bu, Z. Ren, C. Yao, F. Huang, Y. B. Cheng and J. Tong, *Journal of Energy Chemistry*, 2024, 93, 64–70.
- 199 X. Jiang, Q. Zhou, Y. Lu, H. Liang, W. Li, Q. Wei, M. Pan, X. Wen, X. Wang, W. Zhou, D. Yu, H. Wang, N. Yin, H. Chen, H. Li, T. Pan, M. Ma, G. Liu, W. Zhou, Z. Su, Q. Chen, F. Fan, F. Zheng, X. Gao, Q. Ji and Z. Ning, *Natl Sci Rev*, , DOI:10.1093/nsr/nwae055.
- 200 Q. Sun, Z. Zhang, H. Yu, J. Huang, X. Li, L. Dai, Q. Wang, Y. Shen and M. Wang, *Energy Environ Sci*, , DOI:10.1039/d3ee03898j.
- 201 P. Jia, G. Chen, G. Li, J. Liang, H. Guan, C. Wang, D. Pu, Y. Ge, X. Hu, H. Cui, S. Du, C. Liang, J. Liao, G. Xing, W. Ke and G. Fang, *Advanced Materials*, , DOI:10.1002/adma.202400105.
- 202 J. Zhou, T. Wen, J. Sun, Z. Shi, C. Zou, Z. Shen, Y. Li, Y. Wang, Y. Lin, S. Yang, F. Liu and Z. Yang, *ACS Energy Lett*, 2024, 1984–1992.
- 203 Y. Dong, R. Yu, G. Su, Z. Ma, Z. He, R. Wang, Y. Zhang, J. Yang, Y. Gong, M. Li and Z. Tan, *Advanced Materials*, , DOI:10.1002/adma.202312704.
- 204 X. Hu, F. Yao, C. Wang, H. Cui, P. Jia, S. Du, S. Zhou, H. Guan, Q. Lin, W. Ke, C. Tao and G. Fang, *Chemical Engineering Journal*, 2024, 151379.
